# Supplementary material for: Runup of landslide-generated tsunamis controlled by paleogeography and sea-level change
Source: Springer Nature journal article supplement (doi:10.1038/s43247-022-00572-w), 2022-10-19
Supplement: MOESM1 [file 43247_2022_572_MOESM1_ESM.pdf]

Table S1: Sedimentation rates used to restore the paleo-shorelines in this study. See Figure 1 for the location of points where sedimentation rates were calculated.

| Sedimentation rate | Ages                | Locations                         | Longitude / E | Latitude / N | References         |
|--------------------|---------------------|-----------------------------------|---------------|--------------|--------------------|
| 14.0 cm/ka         | Quaternary-Pliocene | Well LF14                         | 116°16'16"    | 21°34'58"    | Ref. <sup>1</sup>  |
| 100.0 cm/ka        | Holocene            | Offshore northeast Hainan Island  | 109°25'18"    | 20°14'59"    | Ref. <sup>2</sup>  |
| 39 cm/ka           | Quaternary          | Taiwan Strait                     | 116°33'00"    | 22°55'15"    | Ref. <sup>3</sup>  |
| 113 cm/ka          | Quaternary          | Offshore Xiamen                   | 118°35'00"    | 24°07'00"    | Ref. <sup>4</sup>  |
| 11.3 cm/ka         | Quaternary          | Zhongscha Island                  | 115°28'18"    | 18°08'00"    | Ref. <sup>5</sup>  |
| 46.9 cm/ka         | Quaternary          | GMGS05                            | 117°24'09"    | 20°48'45"    | Ref. <sup>6</sup>  |
| 36.9 cm/ka         |                     | GMGS07                            | 117°17'34"    | 21°03'29"    |                    |
| 56.6 cm/ka         |                     | GMGS08                            | 117°23'44"    | 21°01'31"    |                    |
| 73.3 cm/ka         |                     | GMGS09                            | 117°18'08"    | 21°07'30"    |                    |
| 51.3 cm/ka         |                     | GMGS16                            | 117°45'45"    | 21°06'49"    |                    |
| Thickness map      | Quaternary          | Qiongdongnan Basin                | --            | --           | Ref. <sup>7</sup>  |
| 139 cm/ka          | Quaternary          | Yinggehai Basin                   | 108°07'57"    | 17°56'21"    | Ref. <sup>8</sup>  |
| 115 cm/ka          | Quaternary          | Qiongdongnan Basin                | 110°46'40"    | 17°07'17"    |                    |
| Thickness map      | Quaternary          | Yinggehai Basin                   | --            | --           | Ref. <sup>9</sup>  |
| Thickness map      | Quaternary          | Pearl River Mouth Basin           | --            | --           | Ref. <sup>10</sup> |
| Thickness map      | Quaternary          | Pearl River Mouth Basin           | --            | --           | Ref. <sup>11</sup> |
| 490 cm/ka          | Quaternary          | Qinzhou Bay (Site A146)           | 108°40'30"    | 21°32'07"    | Ref. <sup>12</sup> |
| 530 cm/ka          | Quaternary          | Qinzhou Bay (Site A122)           | 108°37'10"    | 21°28'45"    |                    |
| 350 cm/ka          | Quaternary          | Qinzhou Bay (Site A97)            | 108°34'03"    | 21°25'37"    |                    |
| 230 cm/ka          | Quaternary          | Qinzhou Bay (Site A54)            | 108°22'27"    | 21°25'37"    |                    |
| 240 cm/ka          | Quaternary          | Qinzhou Bay (Site B84)            | 108°31'24"    | 21°21'00"    |                    |
| 100 cm/ka          | Quaternary          | West Qiongzhou Strait (Site B553) | 109°25'18"    | 20°15'00"    |                    |
| 490 cm/ka          | Quaternary          | West Qiongzhou Strait (Site B765) | 109°49'24"    | 20°18'08"    |                    |
| 530 cm/ka          | Quaternary          | Offshore northwest                | 108°58'21"    | 20°08'44"    |                    |

|            |                         |                                                    |            |           |                    |
|------------|-------------------------|----------------------------------------------------|------------|-----------|--------------------|
|            |                         | Hainan Island<br>(Site 310)                        |            |           |                    |
| 500 cm/ka  | Quaternary              | Offshore<br>northwest Hainan<br>Island (Site 255)  | 108°52'19" | 20°05'49" |                    |
| 530 cm/ka  | Quaternary              | Offshore south<br>Weizhou Island<br>(Site B349)    | 109°01'29" | 20°48'15" |                    |
| 300 cm/ka  | Quaternary              | Offshore south<br>Weizhou Island<br>(Site B397)    | 109°07'28" | 20°35'56" |                    |
| 440 cm/ka  | Quaternary              | Offshore south<br>Weizhou Island<br>(Site B294)    | 108°55'13" | 20°38'51" |                    |
| 340 cm/ka  | Quaternary              | Central Beibu<br>Bay (Site C31)                    | 108°19'19" | 20°54'01" |                    |
| 200 cm/ka  | Quaternary              | Central Beibu<br>Bay (Site B123)                   | 108°37'23" | 20°29'57" |                    |
| 165 cm/ka  | Quaternary              | ZK2<br>(northwestern<br>slope of the SCS)          | 110°40'41" | 17°15'54" | Ref. <sup>13</sup> |
| 2.4 cm/ka  | Quaternary-<br>Pliocene | IODP U1505                                         | 115°51'32" | 18°55'03" | Ref. <sup>14</sup> |
| 2.3 cm/Ka  | Quaternary              | NS90-103<br>(Western Slope of<br>the SCS)          | 110°23'55" | 11°11'32" | Ref. <sup>15</sup> |
| 13.3 cm/ka | Quaternary              | Baiyun Sag                                         | 114°59'28" | 19°54'10" | Ref. <sup>16</sup> |
| 17.1 cm/ka | Quaternary              | Site 191<br>(Northern slope<br>of the SCS)         | 116°13'13" | 19°02'57" | Ref. <sup>17</sup> |
| 25.1 cm/ka | Quaternary              | 973-4 (Taixinan<br>Basin)                          | 118°49'05" | 21°54'19" | Ref. <sup>18</sup> |
| 14.8 cm/ka | Quaternary              | Well A (Western<br>slope of the<br>Dongsha Massif) | 115°34'26" | 20°32'28" | Ref. <sup>19</sup> |
| 12.9 cm/ka | Quaternary              | Well B (Western<br>slope of the<br>Dongsha Massif) | 115°44'46" | 20°48'40" |                    |
| 49 cm/ka   | Quaternary              | ODP 1144                                           | 117°25'08" | 20°03'11" | Ref. <sup>20</sup> |
| 9.2 cm/ka  | Quaternary              | ODP 1145                                           | 117°37'52" | 19°35'02" |                    |
| 6.9 cm/ka  |                         | ODP 1148                                           | 116°33'56" | 18°50'10" |                    |
| 12 cm/ka   | Quaternary              | ODP 1146                                           | 116°16'22" | 19°27'24" | Ref. <sup>21</sup> |
| 4.1 cm/ka  | Quaternary              | ODP 1147                                           | 116°33'17" | 18°50'07" |                    |
| 38 cm/ka   | Quaternary              | Well DLW3101                                       | 115°21'18" | 20°09'54" | Ref. <sup>22</sup> |

|                  |                     |                                                |            |           |                    |
|------------------|---------------------|------------------------------------------------|------------|-----------|--------------------|
|                  |                     | (Northern slope of the Baiyun Sag-Canyon zone) |            |           |                    |
| 40-85 cm/ka      | Quaternary          | Core 17940 (Southeast Dongsha Massif)          | 117°23'00" | 20°07'00" | Ref. <sup>23</sup> |
| 2 cm/ka          | Quaternary-Pliocene | W2                                             | 115°35'39" | 19°24'55" | Ref. <sup>24</sup> |
| 9.8 cm/ka        | Quaternary-Pliocene | LW31-1-1                                       | 115°36'02" | 19°46'33" |                    |
| 50 cm/ka         | Quaternary          | LS22-1-1                                       | 110°45'44" | 17°39'03" |                    |
| 42 m/ka          | Quaternary          | LS33-1-1                                       | 110°42'39" | 17°25'21" |                    |
| 120 cm/ka        | Quaternary          | C19 (eastern Xisha Trough)                     | 111°09'38" | 16°53'53" | Ref. <sup>25</sup> |
| 48.2 m/Ma        | Quaternary          | SH1                                            | 115°16'03" | 19°46'02" | Ref. <sup>26</sup> |
| 72.6 m/Ma        | Quaternary          | SH2                                            | 115°14'23" | 19°46'28" |                    |
| 60.8 m/Ma        | Quaternary          | SH5                                            | 115°20'42" | 19°44'54" |                    |
| 76.8 m/Ma        | Quaternary          | SH7                                            | 115°14'12" | 19°48'51" |                    |
| 17.5 cm/ka       | Quaternary          | MD05-2904                                      | 116°15'09" | 19°27'19" | Ref. <sup>27</sup> |
| 9.6 cm/ka        | Quaternary          | N-31                                           | 112°30'20" | 17°42'32" | Ref. <sup>28</sup> |
| 3.1-7.4 cm/ka    | Quaternary          | Upper slope of the Baiyun Sag                  | 118°38'45" | 22°07'51" | Ref. <sup>29</sup> |
| 49 cm/ka         | Quaternary          | South of the Dongsha Massif                    | 117°25'08" | 20°03'11" | Ref. <sup>30</sup> |
| 2.58-10.40 cm/ka | Quaternary          | Deep water of the SCS                          | 117°57'21" | 16°52'57" | Ref. <sup>31</sup> |
| 8.3 cm/da        | Quaternary          | XK1                                            | 111°44'06" | 16°24'42" | Ref. <sup>32</sup> |
| 25 cm/ka         | Quaternary          | PC338                                          | 110°24'00" | 16°42'00" | Ref. <sup>33</sup> |
| Thickness map    | Quaternary          | Offshore Hainan                                | -          | -         | Ref. <sup>34</sup> |
| 77.8 cm/ka       | Quaternary          | Xisha Massif                                   | 117°46'16" | 16°36'49" | Ref. <sup>35</sup> |
| 25.6 cm/ka       | Quaternary          | Northern shelf of the SCS                      | 114°25'26" | 21°56'42" | Ref. <sup>36</sup> |

Table S2: Parameters used in the NHWAVE model.

|                                                                |                       |
|----------------------------------------------------------------|-----------------------|
| Landslide density (kg/m <sup>3</sup> )                         | 1750                  |
| Cartesian grids resolution (m)                                 | 1100                  |
| Effective kinematic viscosity of the slide (m <sup>2</sup> /s) | 0.1                   |
| Bottom friction coefficient                                    | 0.0025                |
| Total time of modelling (s)                                    | 7200<br>(0~2nd hours) |

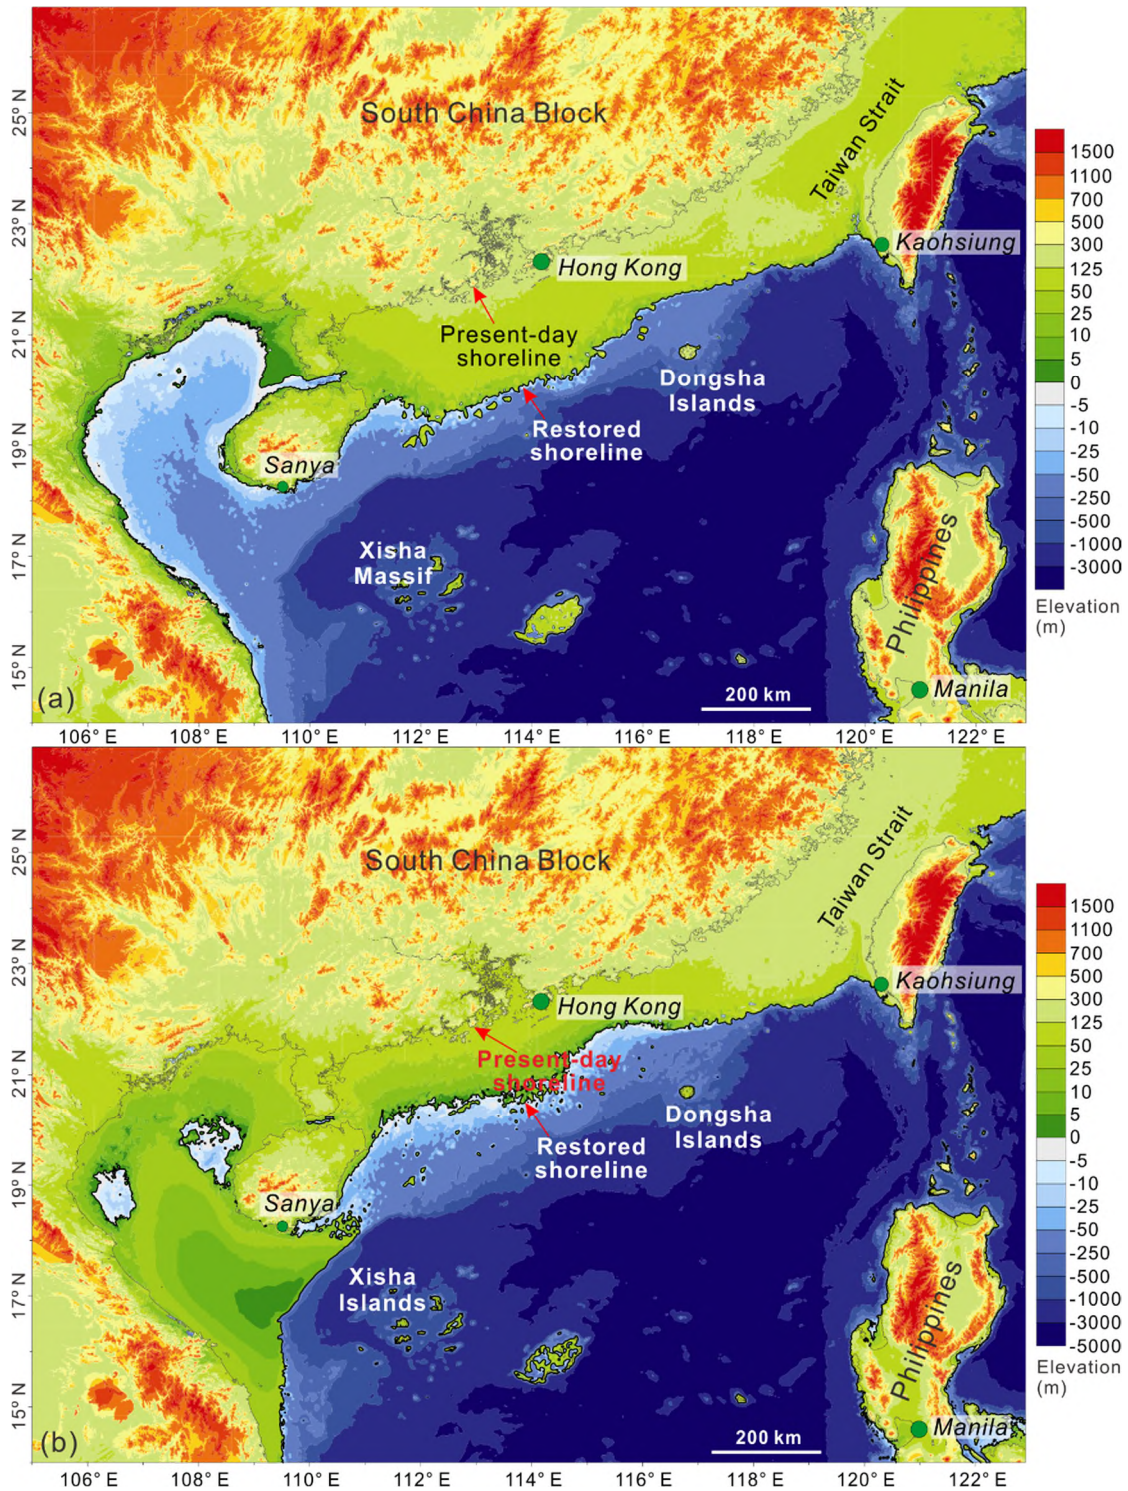

Figure S1: (a) Restoration of the paleo-shoreline at 0.54 Ma considering solely the effect of relative sea-level change. The continental shelf of the northern South China Sea is more sensitive to relative sea-level change than its northwest sector near the Yinggehai Basin; (b) Restoration of the paleo-shoreline at 0.54 Ma considering solely sediment supply as the main controlling factor. The Yinggehai Basin is more sensitive to sedimentary dynamics than the remainder of the northern South China Sea. See Figure 4 for the restoration of the paleo-shoreline at 0.54 Ma considering both the effect of relative sea-level changes and sediment supply.

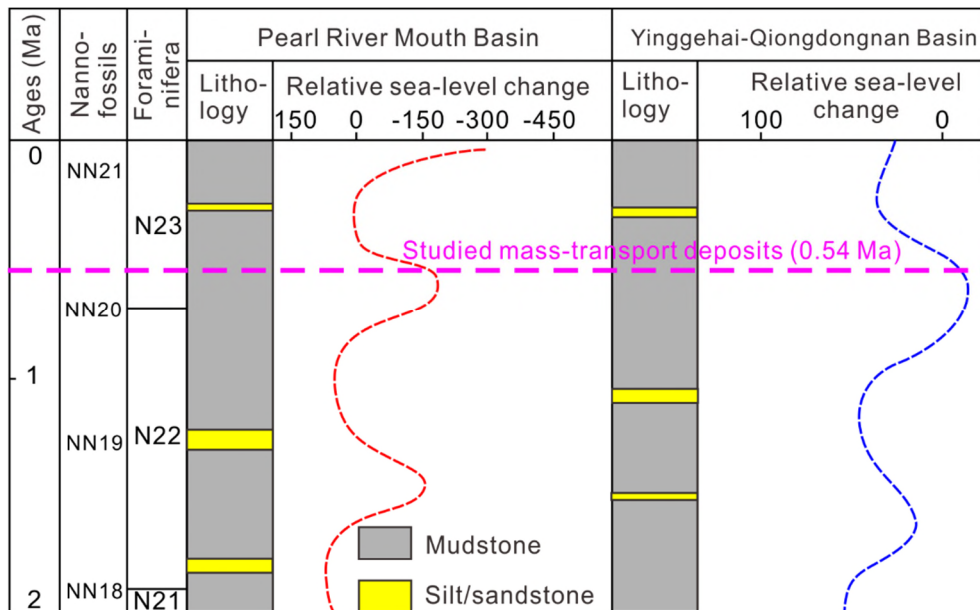

Figure S2: Relative sea-level change curves for the Pearl River Mouth<sup>37</sup> and Yinggehai and Qiongdongnan basins<sup>38,39</sup>. The studied mass-transport deposit (0.54 Ma) is labeled with a pink dashed line. Lithological data for the Pearl River Mouth and Qiongdongnan basins are based on Ref.<sup>39</sup> and Ref.<sup>40</sup>.

## Supplementary References

1. Xue, L. Y., Ding, X., Pei, R. J. & Wan, X. Q. Miocene evolution of paleo-water depth and subsidence revealed in Well LF14 from Lufeng Sag, northern South China Sea. *Journal of Tropical Oceanography*. **37**, 72-83, doi:10.11978/2017060 (2018).
2. Xu, D., Chu, F. Y., Li, J. B., Yang, H. L. & Chen, L. Transport and Deposition of Sediment on the Shelf off Western Guangdong to Northeastern Hainan. *Journal of Jilin University. Earth Science Edition*. **44**, 905-917, doi:10.13278/j.cnki.jjuese (2014).
3. Xu, Z. F., Wang, M. L., Hong, A. S., Guo, F. Z. & Liu, G. Q. Ages of sediments and sedimentation rates of the western Taiwan Strait since Late Pleistocene. *Journal of Oceanography in Taiwan Strait*. **8**, 115-121 (1989).
4. Yue, Y. Z. 14C dating of the deep-sea sediments from the central South China Sea. *Donghai Marine Science*. **5**, 153-157 (1987).
5. Xu, Z. F. Sedimentary rates and changing mechanism in northern and middle South China Sea since Late Pleistocene. *Journal of Oceanography in Taiwan Strait*. **14**, 356-360 (1995).
6. Chen, F. *et al.* Calcareous Nannofossils and Foraminifera Biostratigraphy on the Northeastern Slope of the South China Sea and Variation in Sedimentation Rates. *Earth Science*. **41**, 416-424, doi:10.3799/dqkx.2016.033 (2016).
7. Zhao, Z. X. *et al.* The high resolution sedimentary filling in Qiongdongnan Basin, Northern South China Sea. *Mar. Geol.* **361**, 11-24, doi:10.1016/j.margeo.2015.01.002 (2015).
8. Wang, G. Z., Chu, F. Y. & Wang, C. S. Paleoelevation reconstruction of Red River drainage areas in Western Yunnan Plateau since Miocene. *Journal of Chengdu University of Technology. Science & Technology Edition*. **31**, 118-124 (2004).
9. Lei, C. Structure and Evolution of Yinggehai and Qiongdongnan Basins, South China Sea: Implications for Cenozoic Tectonics in Southeast Asia. Ph.D thesis, (2012).
10. Xie, H. *et al.* Cenozoic sedimentary evolution of deepwater sags in the Pearl River Mouth Basin, northern South China Sea. *Mar. Geophys. Res.* **34**, 159-173, doi:10.1007/s11001-013-9183-7 (2013).
11. Zhuo, H. T. *et al.* Contrasting fluvial styles across the mid-Pleistocene climate transition in the northern shelf of the South China Sea: Evidence from 3D seismic data. *Quat. Sci. Rev.* **129**, 128-146, doi:10.1016/j.quascirev.2015.10.012 (2015).
12. Xu, D. Sedimentary records since Last Deglaciation and the formation of modern sedimentary pattern in eastern Beibu Gulf. Ph.D thesis, (2014).
13. Feng, L., Feng, X. L., Wang, X. M. & Xiao, X. Sediment Provenance and Climate Change Since the Last Glacial Maximum Record by Major and Trace Elements in the Northwestern Slope of the South China Sea. *Periodical of Ocean University of China*. **50**, 88-100, doi:10.16441/j.cnki.hdx.20190217 (2020).
14. Jian, Z. *et al.* International ocean discovery program expedition 368 preliminary report: South China Sea Rifted Margin Testing hypotheses for lithosphere thinning during continental breakup: Drilling at the South China Sea rifted margin. *Integrated Ocean Drilling Program: Preliminary Reports*. **368**, 1-54 (2018).
15. Wei, G. J., Gui, X. T. & Yu, J. S. A study on the dating of deposit core NS90-103 from the South China Sea. *Geochimica*. **25**, 494-502, doi:10.19700/j.0379-1726.1996.05.008 (1996).
16. Dong, D. D., Wang, D. W., Zhang, G. C., Wu, S. G. & Yuan, S. Q. Cenozoic tectonic and sedimentary evolution of deepwater area, Pearl River Mouth Basin. *Journal of China University of Petroleum. Edition of Natural Science*. **33**, 17 (2009).
17. Zhao, H. Q., Han, X. B., Chen, R. H., Chu, F. Y. & Gao, S. T. Characteristics of main elements and their palaeoenvironment significance of Core 191 in the northern South China Sea. *Acta Oceanologica Sinica*. **30**, 85-93 (2008).
18. Zhang, B. D., Wu, D. D. & Wu, N. Y. Characteristics of sedimentary geochemistry and their response to cold-seep activities in Dongsha, the northern South China Sea. *Marine Geology Frontiers*. **31**, 14-27 (2015).
19. Zhou, Y. R. *et al.* Turbidites at the continental slope on the west side of Dongsha uplift in the northern South China Sea. *Marine Sciences*. **42**, 23-33 (2018).
20. Wang, P., Prell, W. L. & Blum, P. Proceedings of the Ocean Drilling Program, Initial Reports 184: College Station, Texas,

- Ocean Drilling Program. 1-121, doi:10.2973/odp.proc.ir.184.2000 (2000).
21. Shao, L. *et al.* Nd isotopic variations and its implications in the recent sediments from the northern South China Sea. *Chin. Sci. Bull.* **54**, 311-317, doi:10.1007/s11434-008-0453-8 (2009).
  22. Zhou, H. Sediment Characteristics and Paleoenvironmental Significance of Core DLW3101 from Northern Slope of South China Sea. M.S. thesis, (2016).
  23. Wang, L. J. & Sarnthein, M. High-resolution paleocenaographic records during the last 40000 years from the northern South China Sea. *Quaternary Sciences.* **19**, 27-31 (1999).
  24. Xie, H., Qu, H. Y., Shi, H. C. & Kong, D. M. Contrastive analysis on the sedimentary evolution in the deep water areas from west to east, northern South China Sea. *Journal of Guangdong Ocean University.* **40**, 41-50 (2020).
  25. Sun, T. T. *et al.* Geochemical characteristics of surface sediments in the Southern Qiongdongnan Basin of the northern South China Sea and its implication for sedimentary environment. *Journal of Tropical Oceanography.* **37**, 70-80 (2018).
  26. Wang, J. L., Liang, J. Q., Zong, X., Gong, Y. H. & Wan, T. H. Differentiated distribution of Methane hydrate in the Shenhu area of the northern South China Sea and controlling factors. *Marine Geology Frontiers.* **31**, 24-30, doi:1009-2722(2015)01-0024-07 (2015).
  27. Ge, H. M., Li, Q. Y., Cheng, X. R., Zheng, H. B. & He, J. Late Quaternary High Resolution Monsoon Records in Planktonic Stable Isotopes from Northern South China Sea. *Earth Science.* **35**, 515-525, doi:10.3799/dqkz.2010.067 (2010).
  28. Li, X. Y. *et al.* Evolutionary Paleoceanographic Characteristics in the Northern South China Sea Since Late Pleistocene:Evidence from Core N-31. *Acta Sedimentologica Sinica.* **29**, 572-580, doi:10.14027/j.cnki.cjxb.2011.03.012 (2011).
  29. Sha, Z. B. Integrated prediction and evaluation for natural gas hydrate resource of XN study area in the northeastern South China Sea. Ph.D thesis, (2019).
  30. Shao, L., Li, X. H., Wei, G. J., Liu, Y. & Fang, D. Y. Sediment sources of the high-speed accumulation bodies on the continental slope of South China Sea. *Science in China (Series D)* **31**, 828-833 (2001).
  31. Zhang, W. Y., Zhang, F. Y., Chen, R. H. & Zhang, X. Y. Constituents of Matter and Sedimentation Fluxes and Sedimentation Rates of Deep-water Sedimentation during the Late Pleistocene in the South China Sea. *Acta Sedimentologica Sinica.* **20**, 668-674, doi:10.14027/j.cnki.cjxb.2002.04.023 (2002).
  32. Chen, B. C. Evolution of reef-bank system in the north and south continental margins of South China Sea and their difference -- Examples for the fine characterization of wells XK 1 and NK1. Ph.D thesis, (2020).
  33. Li, M. K. Paleoclimate and paleoenvironment evolutions in the Northwestern South China Sea over the past 36 kyr BP and the forcing mechanisms. Ph.D thesis, (2018).
  34. Xiong, P. Paleogeographic reconstructions and sedimentary response since Late Pleistocene in the northwestern margin of South China Sea. Ph.D thesis, (2019).
  35. Liu, G. *et al.* Sedimentation rate and geochemical characters of the lagoonal deposits in the Yongle Atoll,Xisha Islands. *Marine Geology & Quaternary Geology.* **38**, 69-77, doi:10.16562/j.cnki.0256-1492.2018.06.007 (2018).
  36. Zhang, Z. L. *et al.* The chronological and paleoclimatic study of the late Pleistocene continental shelf sediments, Northern South China Sea: using core DG as an example. *Seismology and Geology.* **43**, 1351-1367, doi:10.3969/j.issn.0253-4967.2021.06.001 (2021).
  37. Xu, S. C., Yang, S. K. & Huang, L. F. The application of sequence stratigraphy to stratigraphic correlation. *Earth Science Frontiers.* **2**, 115-123 (1995).
  38. Hao, Y. C., Chen, P. F., Wan, X. Q. & Dong, J. S. Late Tertiary sequence stratigraphy and sea level changes in Yinggehai-Qiongdongnan Basin. *Geoscience.* **14**, 237-245 (2000).
  39. Su, M. *et al.* Controlling factors on the submarine canyon system: A case study of the Central Canyon System in the Qiongdongnan Basin, northern South China Sea. *Sci. China-Earth Sci.* **57**, 2457-2468, doi:10.1007/s11430-014-4878-4 (2014).

40. He, M. *et al.* Rapid post-rift tectonic subsidence events in the Pearl River Mouth Basin, northern South China Sea margin. *J. Asian Earth Sci.* **147**, 271-283, doi:10.1016/j.jseaes.2017.07.024 (2017).
